# Supplementary material for: Theoretically revealing the activity origin of the hydrogen evolution reaction on carbon-based single-atom catalysts and finding ideal catalysts for water splitting
Source: Royal Society of Chemistry journal article supplement (doi:10.1039/d2ta07167c), 2022-01-01
Supplement: d2ta07167c1.pdf [file d2ta07167c1.pdf]

## Supporting information

# **Theoretically revealing the activity origin of hydrogen evolution reaction on carbon-based single-atom catalysts and finding the ideal catalysts for water splitting**

Yiran Wang, Xiaoya Huang, Hanwei Fu, Jiaxiang Shang\*

*School of Materials Science and Engineering, Beihang University, Beijing 100191,  
China*

\* Corresponding Author

Jiaxiang Shang: [shangjx@buaa.edu.cn](mailto:shangjx@buaa.edu.cn)

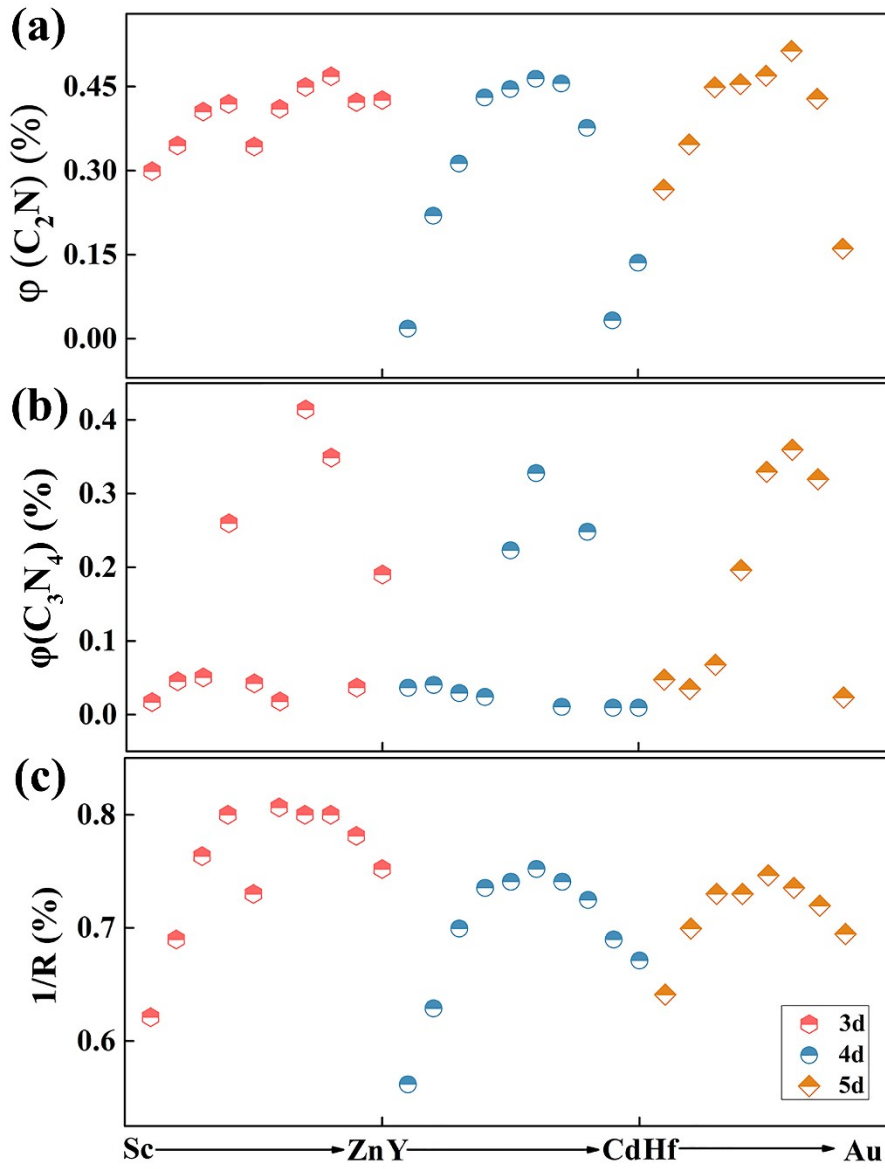

**Fig. S1** Deviation degree ( $\varphi$ ) between the TM atoms and the defect center in (a)  $C_2N$  (b)  $C_3N_4$ . (c)  $1/R$  of the  $3d$ ,  $4d$  and  $5d$  TM atoms.

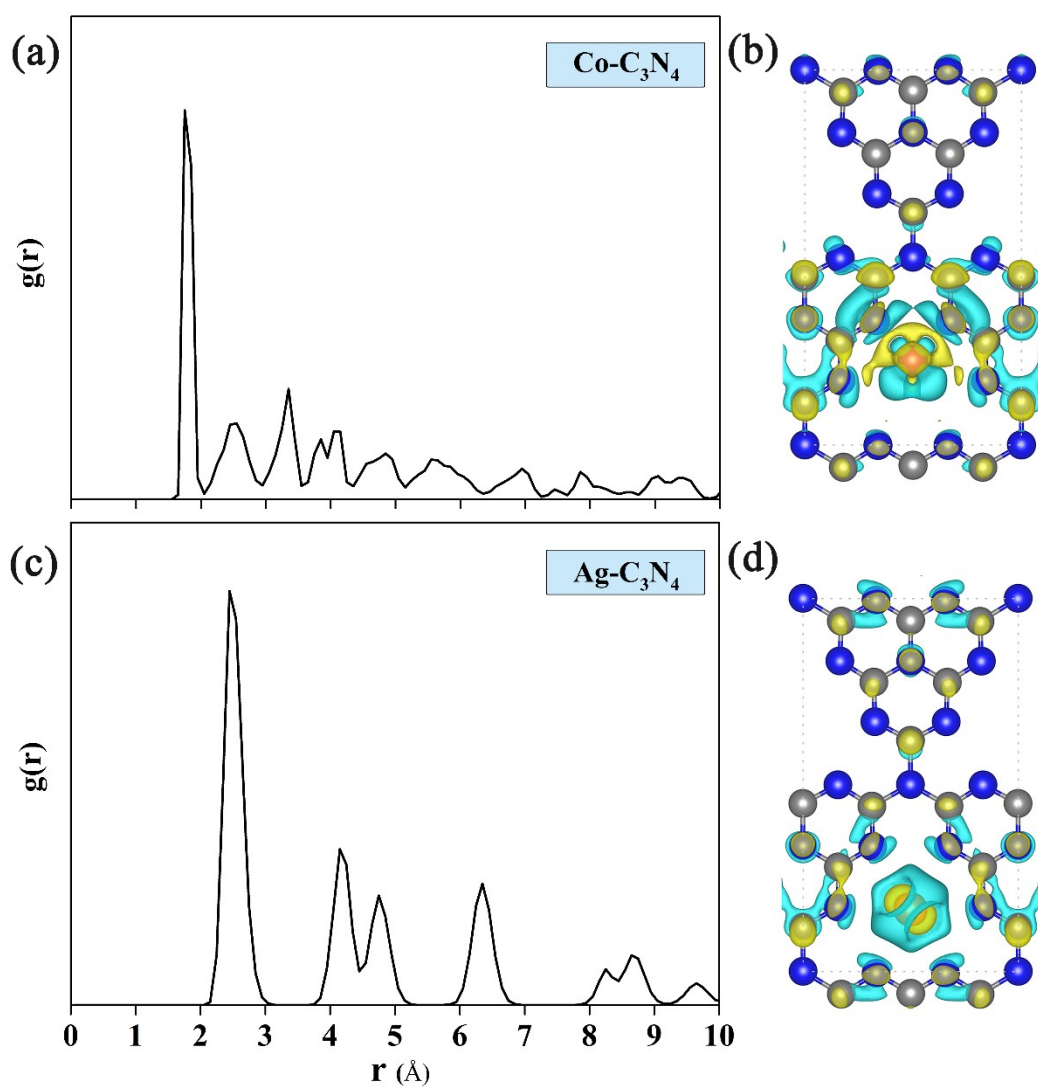

**Fig. S2** (a) Radial distribution function (RDF) between Co and N on  $C_3N_4$ . (b) The charge density difference (CDD) of  $Co-C_3N_4$ . (c) RDF between Ag and N on  $C_3N_4$ . (d) The CDD of  $Ag-C_3N_4$ . Yellow and cyan regions represent the charge accumulation and depletion, respectively. The value of iso-surface is  $0.003 e \text{ \AA}^{-3}$ .

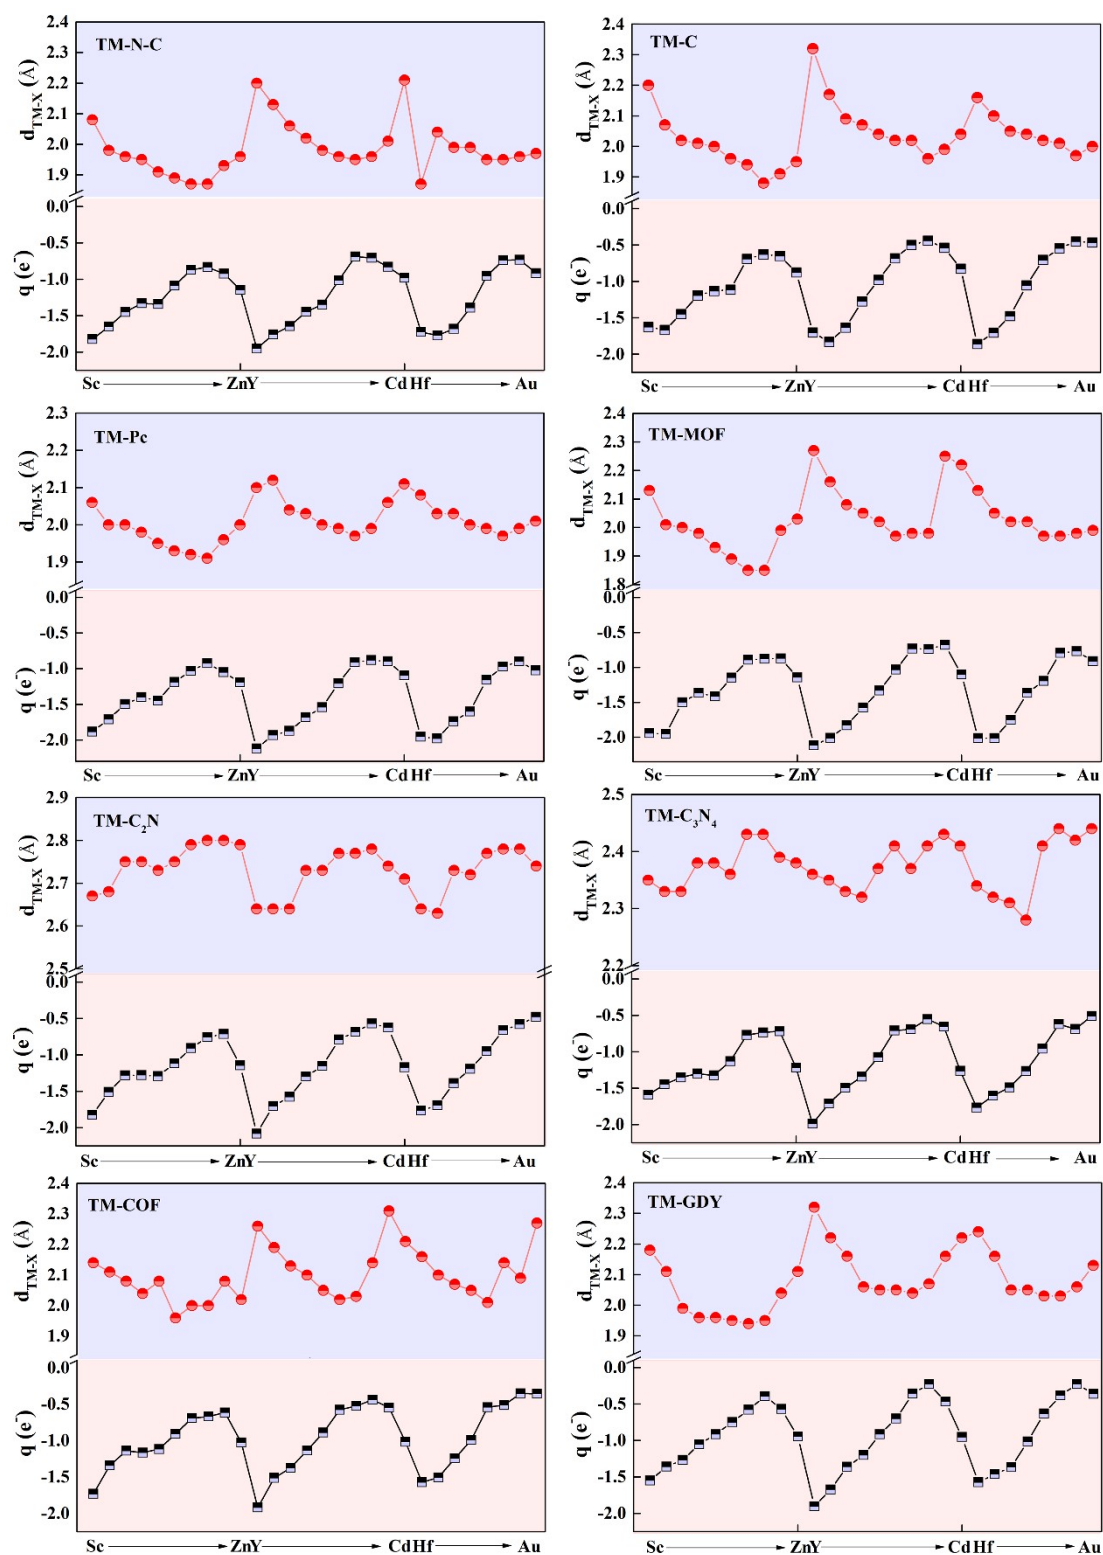

**Fig. S3** The red dots represent the average bond lengths ( $d_{\text{TM-X}}$ ) between the TM atom and the coordination atoms, the black squares are the charge transfer from the TM atoms to carbon-based supports.

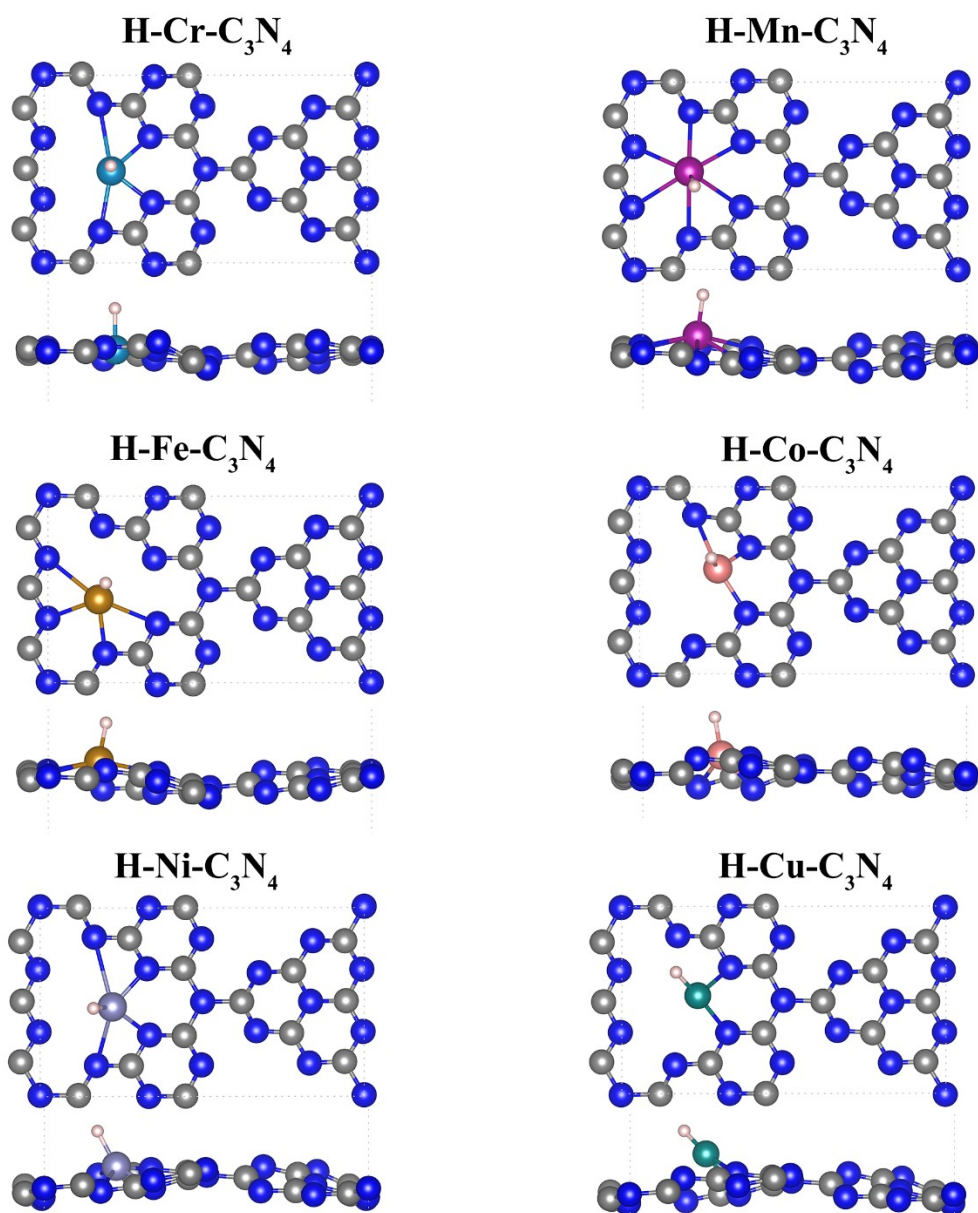

**Fig. S4** The top and side views of H adsorbed on Cr/Mn/Fe/Co/Ni/Cu-C<sub>3</sub>N<sub>4</sub> (denoted as H-TM-C<sub>3</sub>N<sub>4</sub>). The blue, grey, cyan, purple, golden, pink, white, light-blue, dark-green and spheres represent the N, C, Cr, Mn, Fe, Co, H, Ni and Cu atoms, respectively.

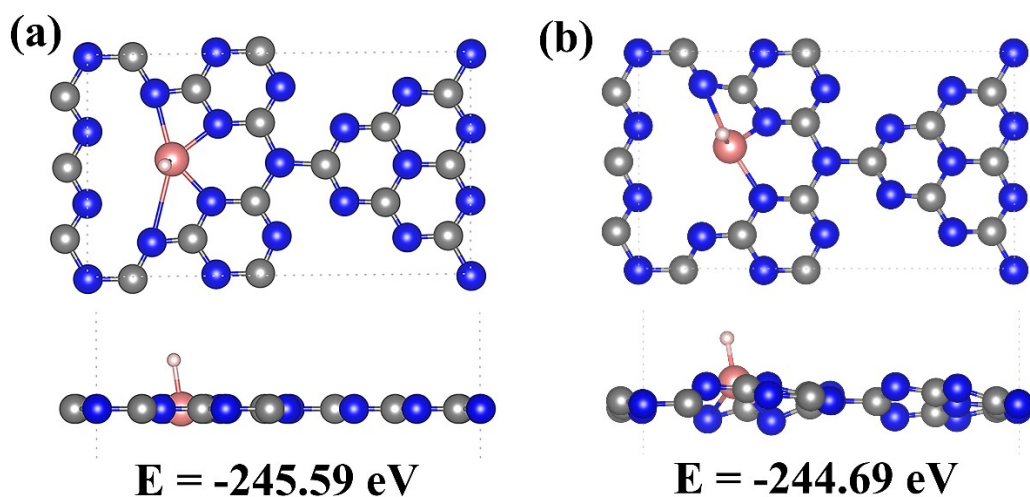

**Fig. S5** Top and side views of (a) planar and (b) buckle H-Co-C<sub>3</sub>N<sub>4</sub>, respectively. The blue, grey, pink and white spheres represent the N, C, Co and H atoms, respectively.

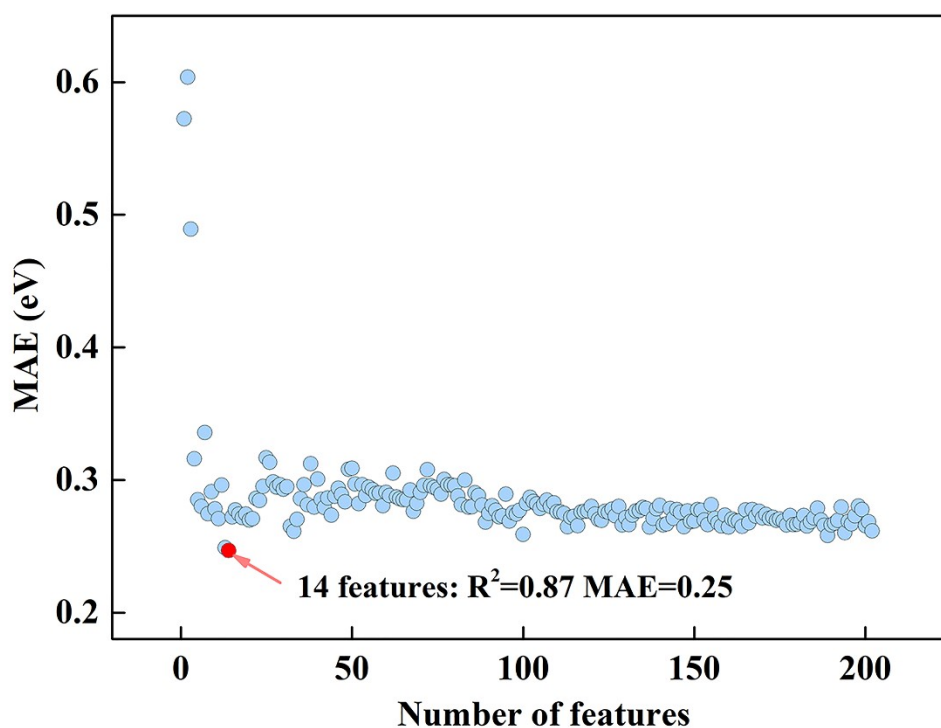

**Fig. S6** GB model prediction accuracy by the stepwise feature selection method. Each dot indicates a combination of features. The red dot represents the combination with the minimum MAE and maximum  $R^2$ .

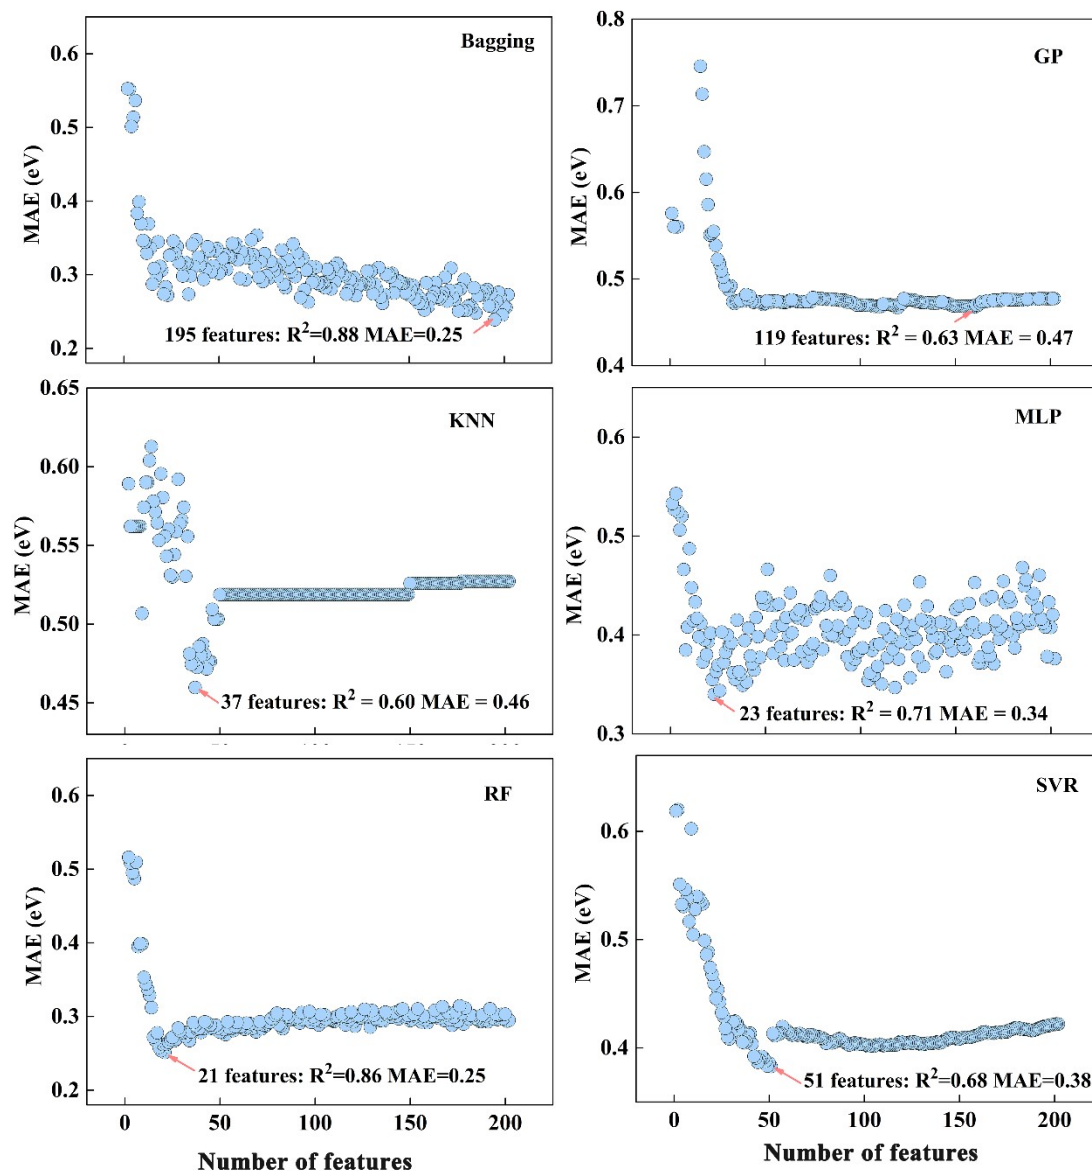

**Fig. S7** Different model prediction accuracy by the stepwise feature selection method. Each dot indicates a combination of features. The combination with the minimum MAE and maximum R<sup>2</sup> has been listed.

In order to clarify whether the accuracy of other ML models will be higher than that of GB model after dimensionality reduction, we also performed RFE (combining features importance ranking) for other ML models in Fig. S7. The results indicated that the GB model remains to exhibit the highest accuracy. For KNN, GP, MLP and SVR models, we adopted the analysis framework of SHAP (Shapley Additive exPlanation) to interpret the importance of each feature and performed feature importance ranking.



**Table S1** Average bond distance (Å) between TM atom and coordination atoms on TM-N-C, TM-C, TM-MOF and TM-COF catalysts.

| <b>TM</b> | <b>TM-N-C</b> | <b>TM-C</b> | <b>TM-MOF</b> | <b>TM-COF</b> |
|-----------|---------------|-------------|---------------|---------------|
| <b>Sc</b> | 2.08          | 2.20        | 2.13          | 2.14          |
| <b>Ti</b> | 1.98          | 2.07        | 2.01          | 2.11          |
| <b>V</b>  | 1.96          | 2.02        | 2.00          | 2.08          |
| <b>Cr</b> | 1.95          | 2.01        | 1.98          | 2.04          |
| <b>Mn</b> | 1.91          | 2.00        | 1.93          | 2.08          |
| <b>Fe</b> | 1.89          | 1.96        | 1.89          | 1.96          |
| <b>Co</b> | 1.87          | 1.94        | 1.85          | 2.00          |
| <b>Ni</b> | 1.87          | 1.88        | 1.85          | 2.00          |
| <b>Cu</b> | 1.93          | 1.91        | 1.99          | 2.08          |
| <b>Zn</b> | 1.96          | 1.95        | 2.03          | 2.02          |
| <b>Y</b>  | 2.20          | 2.32        | 2.27          | 2.26          |
| <b>Zr</b> | 2.13          | 2.17        | 2.16          | 2.19          |
| <b>Nb</b> | 2.06          | 2.09        | 2.08          | 2.13          |
| <b>Mo</b> | 2.02          | 2.07        | 2.05          | 2.10          |
| <b>Tc</b> | 1.98          | 2.04        | 2.02          | 2.05          |
| <b>Ru</b> | 1.96          | 2.02        | 1.97          | 2.02          |
| <b>Rh</b> | 1.95          | 2.02        | 1.98          | 2.03          |
| <b>Pd</b> | 1.96          | 1.96        | 1.98          | 2.14          |
| <b>Ag</b> | 2.01          | 1.99        | 2.25          | 2.31          |
| <b>Cd</b> | 2.21          | 2.04        | 2.22          | 2.21          |
| <b>Hf</b> | 1.87          | 2.16        | 2.13          | 2.16          |
| <b>Ta</b> | 2.04          | 2.10        | 2.05          | 2.10          |
| <b>W</b>  | 1.99          | 2.05        | 2.02          | 2.07          |
| <b>Re</b> | 1.99          | 2.04        | 2.02          | 2.05          |
| <b>Os</b> | 1.95          | 2.02        | 1.97          | 2.01          |
| <b>Ir</b> | 1.95          | 2.01        | 1.97          | 2.14          |
| <b>Pt</b> | 1.96          | 1.97        | 1.98          | 2.09          |
| <b>Au</b> | 1.97          | 2.00        | 1.99          | 2.27          |



**Table S2** Average bond distance (Å) between TM atom and coordination atoms on TM-Pc, TM-GDY, TM-C<sub>2</sub>N and TM-C<sub>3</sub>N<sub>4</sub> catalysts.

| <b>System</b> | <b>TM-Pc</b> | <b>TM-GDY</b> | <b>TM-C<sub>2</sub>N</b> | <b>TM-C<sub>3</sub>N<sub>4</sub></b> |
|---------------|--------------|---------------|--------------------------|--------------------------------------|
| <b>Sc</b>     | 2.06         | 2.18          | 2.67                     | 2.35                                 |
| <b>Ti</b>     | 2.00         | 2.11          | 2.68                     | 2.33                                 |
| <b>V</b>      | 2.00         | 1.99          | 2.75                     | 2.33                                 |
| <b>Cr</b>     | 1.98         | 1.96          | 2.75                     | 2.38                                 |
| <b>Mn</b>     | 1.95         | 1.96          | 2.73                     | 2.38                                 |
| <b>Fe</b>     | 1.93         | 1.95          | 2.75                     | 2.36                                 |
| <b>Co</b>     | 1.92         | 1.94          | 2.79                     | 2.43                                 |
| <b>Ni</b>     | 1.91         | 1.95          | 2.80                     | 2.43                                 |
| <b>Cu</b>     | 1.96         | 2.04          | 2.80                     | 2.39                                 |
| <b>Zn</b>     | 2.00         | 2.11          | 2.79                     | 2.38                                 |
| <b>Y</b>      | 2.10         | 2.32          | 2.64                     | 2.36                                 |
| <b>Zr</b>     | 2.12         | 2.22          | 2.64                     | 2.35                                 |
| <b>Nb</b>     | 2.04         | 2.16          | 2.64                     | 2.33                                 |
| <b>Mo</b>     | 2.03         | 2.06          | 2.73                     | 2.32                                 |
| <b>Tc</b>     | 2.00         | 2.05          | 2.73                     | 2.37                                 |
| <b>Ru</b>     | 1.99         | 2.05          | 2.77                     | 2.41                                 |
| <b>Rh</b>     | 1.97         | 2.04          | 2.77                     | 2.37                                 |
| <b>Pd</b>     | 1.99         | 2.07          | 2.78                     | 2.41                                 |
| <b>Ag</b>     | 2.06         | 2.16          | 2.74                     | 2.43                                 |
| <b>Cd</b>     | 2.11         | 2.22          | 2.71                     | 2.41                                 |
| <b>Hf</b>     | 2.08         | 2.24          | 2.64                     | 2.34                                 |
| <b>Ta</b>     | 2.03         | 2.16          | 2.63                     | 2.32                                 |
| <b>W</b>      | 2.03         | 2.05          | 2.73                     | 2.31                                 |
| <b>Re</b>     | 2.00         | 2.05          | 2.72                     | 2.28                                 |
| <b>Os</b>     | 1.99         | 2.03          | 2.77                     | 2.41                                 |
| <b>Ir</b>     | 1.97         | 2.03          | 2.78                     | 2.44                                 |
| <b>Pt</b>     | 1.99         | 2.06          | 2.78                     | 2.42                                 |
| <b>Au</b>     | 2.01         | 2.13          | 2.74                     | 2.44                                 |

**Table S3** The calculated  $E_f$  (eV) and  $U_{\text{diss}}$  for  $3d$ ,  $4d$  and  $5d$  TM embedding in N-C, C,  $C_3N_4$  and MOF.

| TM        | TM-N-C |                   | TM-C  |                   | TM- $C_3N_4$ |                   | TM-MOF |                   |
|-----------|--------|-------------------|-------|-------------------|--------------|-------------------|--------|-------------------|
|           | $E_f$  | $U_{\text{diss}}$ | $E_f$ | $U_{\text{diss}}$ | $E_f$        | $U_{\text{diss}}$ | $E_f$  | $U_{\text{diss}}$ |
| <b>Sc</b> | -4.15  | -0.70             | -3.13 | -1.04             | -2.57        | -1.22             | -5.73  | -0.17             |
| <b>Ti</b> | -2.69  | -0.28             | -3.86 | 0.30              | -1.14        | -1.06             | -4.75  | 0.75              |
| <b>V</b>  | -2.18  | -0.09             | -2.76 | 0.20              | 0.11         | -1.23             | -3.97  | 0.80              |
| <b>Cr</b> | -2.84  | 0.51              | -2.85 | 0.52              | 0.75         | -1.29             | -3.86  | 1.02              |
| <b>Mn</b> | -2.87  | 0.25              | -3.08 | 0.35              | 0.55         | -1.46             | -3.87  | 0.75              |
| <b>Fe</b> | -2.42  | 0.76              | -2.70 | 0.90              | 1.48         | -1.19             | -3.24  | 1.17              |
| <b>Co</b> | -2.75  | 1.09              | -2.80 | 1.12              | 1.69         | -1.13             | -3.45  | 1.44              |
| <b>Ni</b> | -2.85  | 1.17              | -3.13 | 1.31              | 1.58         | -1.05             | -3.14  | 1.31              |
| <b>Cu</b> | -1.63  | 1.16              | -3.17 | 1.92              | 1.51         | -0.41             | -2.20  | 1.44              |
| <b>Zn</b> | -2.51  | 0.50              | -3.38 | 0.93              | 1.09         | -1.30             | -3.35  | 0.92              |
| <b>Y</b>  | -4.04  | -1.02             | -2.94 | -1.39             | -3.05        | -1.35             | -5.50  | -0.54             |
| <b>Zr</b> | -2.67  | -0.78             | -4.03 | -0.44             | -1.71        | -1.02             | -5.09  | -0.18             |
| <b>Nb</b> | -1.17  | -0.71             | -0.05 | -1.08             | 0.05         | -1.12             | -3.20  | -0.03             |
| <b>Mo</b> | -0.02  | -0.19             | -2.45 | 0.62              | 1.97         | -0.86             | -2.54  | 0.65              |
| <b>Tc</b> | -0.46  | 0.63              | -2.83 | 1.82              | 2.95         | -1.07             | -2.25  | 1.53              |
| <b>Ru</b> | -0.76  | 0.84              | -2.99 | 1.96              | 3.03         | -1.06             | -2.32  | 1.62              |
| <b>Rh</b> | -1.93  | 1.57              | -2.93 | 2.07              | 2.56         | -0.68             | -3.12  | 2.16              |
| <b>Pd</b> | -2.51  | 2.20              | -2.67 | 2.29              | 1.81         | 0.05              | -3.06  | 2.48              |
| <b>Ag</b> | 0.24   | 0.56              | -2.17 | 2.97              | 1.12         | -0.32             | -1.37  | 2.17              |
| <b>Cd</b> | -0.73  | -0.03             | -2.04 | 0.62              | 0.88         | -0.84             | -2.38  | 0.79              |
| <b>Hf</b> | -2.67  | -0.88             | -3.74 | -0.62             | -1.39        | -1.20             | -4.55  | -0.41             |
| <b>Ta</b> | -0.80  | -0.33             | -3.02 | 0.41              | 0.86         | -0.89             | -3.22  | 0.47              |
| <b>W</b>  | 0.80   | -0.17             | -2.06 | 0.79              | 3.05         | -0.92             | -1.88  | 0.73              |
| <b>Re</b> | 0.55   | 0.12              | -2.30 | 1.07              | 4.06         | -1.05             | -1.59  | 0.83              |
| <b>Os</b> | -0.09  | 0.85              | -2.67 | 1.17              | 4.42         | 0.29              | -2.17  | 1.11              |
| <b>Ir</b> | -1.63  | 1.70              | -3.07 | 2.18              | 3.27         | 0.07              | -3.06  | 2.18              |
| <b>Pt</b> | -2.85  | 2.61              | -4.16 | 3.26              | 2.91         | -0.28             | -3.60  | 2.98              |
| <b>Au</b> | 0.18   | 1.44              | -3.31 | 2.60              | 3.09         | 0.47              | -0.84  | 1.78              |

**Table S4** The calculated  $E_f$  (eV) and  $U_{\text{diss}}$  for  $3d$ ,  $4d$  and  $5d$  TM embedding in  $C_2N$ , COF, Pc and GDY.

| TM | TM- $C_2N$ |                   | TM-COF |                   | TM-Pc |                   | TM-GDY |                   |
|----|------------|-------------------|--------|-------------------|-------|-------------------|--------|-------------------|
|    | $E_f$      | $U_{\text{diss}}$ | $E_f$  | $U_{\text{diss}}$ | $E_f$ | $U_{\text{diss}}$ | $E_f$  | $U_{\text{diss}}$ |
| Sc | -3.59      | -0.88             | -0.50  | -1.91             | -6.74 | 0.17              | 1.62   | -2.62             |
| Ti | -1.82      | -0.72             | 0.53   | -1.89             | -6.02 | 1.38              | 1.89   | -2.58             |
| V  | -0.65      | -0.86             | 0.98   | -1.67             | -5.98 | 1.81              | 2.69   | -2.53             |
| Cr | -0.35      | -0.73             | 1.17   | -1.49             | -5.89 | 2.03              | 2.16   | -1.99             |
| Mn | -0.45      | -0.97             | 1.20   | -1.79             | -5.62 | 1.62              | 0.87   | -1.62             |
| Fe | 0.51       | -0.70             | 2.03   | -1.47             | -4.99 | 2.05              | 0.86   | -0.88             |
| Co | 0.74       | -0.65             | 1.61   | -1.09             | -5.09 | 2.26              | -0.03  | -0.27             |
| Ni | 0.56       | -0.54             | 1.38   | -0.95             | -5.26 | 2.37              | 2.55   | -1.53             |
| Cu | 0.51       | 0.08              | 1.44   | -0.38             | -4.15 | 2.41              | 0.65   | 0.02              |
| Zn | -0.19      | -0.67             | 1.13   | -1.32             | -5.17 | 1.83              | 1.91   | -1.72             |
| Y  | -4.91      | -0.73             | -0.58  | -2.18             | -7.85 | 0.25              | 2.77   | -3.29             |
| Zr | -2.72      | -0.77             | 0.69   | -1.62             | -5.48 | -0.08             | 3.20   | -2.25             |
| Nb | -0.72      | -0.86             | 2.02   | -1.77             | -4.14 | 0.28              | 3.62   | -2.31             |
| Mo | 0.74       | -0.45             | 2.61   | -1.07             | -3.79 | 1.06              | 2.31   | -0.97             |
| Tc | 1.32       | -0.26             | 2.80   | -1.00             | -3.78 | 2.29              | 3.72   | -1.46             |
| Ru | 1.53       | -0.30             | 2.35   | -0.71             | -3.74 | 2.33              | 3.17   | -1.13             |
| Rh | 0.77       | 0.21              | 1.54   | -0.17             | -4.62 | 2.91              | 1.96   | -0.38             |
| Pd | 0.38       | 0.76              | 1.35   | 0.28              | -5.42 | 3.66              | 0.73   | 0.59              |
| Ag | -0.31      | 1.11              | 1.30   | -0.50             | -2.86 | 3.66              | 1.86   | -1.06             |
| Cd | -0.78      | -0.01             | 1.61   | -1.20             | -3.43 | 1.31              | 3.15   | -1.97             |
| Hf | -2.27      | -0.98             | 0.93   | -1.78             | -5.17 | -0.26             | 3.28   | -2.37             |
| Ta | -0.05      | -0.58             | 2.68   | -1.49             | -4.06 | 0.75              | 4.12   | -1.97             |
| W  | 2.03       | -0.58             | 3.86   | -1.19             | -3.05 | 1.12              | 5.16   | -1.62             |
| Re | 2.65       | -0.58             | 4.16   | -1.09             | -2.97 | 1.29              | 4.56   | -1.22             |
| Os | 2.61       | 0.51              | 3.34   | 0.42              | -3.15 | 1.23              | 3.75   | 0.37              |
| Ir | 1.52       | 0.65              | 2.31   | 0.39              | -4.51 | 2.66              | 2.30   | 0.39              |
| Pt | 1.27       | 0.55              | 1.83   | 0.27              | -5.88 | 4.12              | 0.84   | 0.76              |
| Au | 1.47       | 1.01              | 2.70   | 0.60              | -2.71 | 2.40              | 2.55   | 0.65              |

**Table S5** Bond distance ( $d_{\text{H-TM}}$  in Å) between adsorbed hydrogen and TM atom, magnetic moment ( $M$  in  $\mu_{\text{B}}$ ) for H-adsorbed systems, and the hydrogen adsorption Gibbs free energies ( $\Delta G_{\text{H}^*}$  in eV) for the TM-N-C and TM-C catalysts.

| System    | TM-N-C            |      |                         | TM-C              |      |                         |
|-----------|-------------------|------|-------------------------|-------------------|------|-------------------------|
|           | $d_{\text{H-TM}}$ | $M$  | $\Delta G_{\text{H}^*}$ | $d_{\text{H-TM}}$ | $M$  | $\Delta G_{\text{H}^*}$ |
| <b>Sc</b> | 2.38              | 0.00 | 0.28                    | 2.65              | 0.00 | 0.92                    |
| <b>Ti</b> | 1.74              | 0.39 | -0.75                   | 2.40              | 0.00 | 0.49                    |
| <b>V</b>  | 1.66              | 0.57 | 0.09                    | 1.66              | 0.00 | -0.09                   |
| <b>Cr</b> | 1.6               | 2.71 | 0.24                    | 1.58              | 2.14 | 0.26                    |
| <b>Mn</b> | 1.55              | 2.21 | 0.35                    | 1.57              | 2.19 | 0.32                    |
| <b>Fe</b> | 1.49              | 0.94 | 0.17                    | 1.47              | 2.72 | 0.32                    |
| <b>Co</b> | 1.44              | 0.00 | 0.11                    | 1.44              | 0.98 | 0.23                    |
| <b>Ni</b> | 1.52              | 0.04 | 1.60                    | 1.69              | 0.20 | -0.47                   |
| <b>Cu</b> | 1.56              | 0.45 | 1.70                    | 1.89              | 0.00 | -0.35                   |
| <b>Zn</b> | 1.56              | 0.00 | 0.98                    | 1.64              | 0.00 | 1.85                    |
| <b>Y</b>  | 2.04              | 0.00 | -0.10                   | 2.80              | 0.14 | 1.09                    |
| <b>Zr</b> | 2.35              | 0.00 | -0.90                   | 1.91              | 0.00 | 0.68                    |
| <b>Nb</b> | 1.81              | 0.00 | -0.76                   | 1.79              | 0.00 | -0.30                   |
| <b>Mo</b> | 1.7               | 1.06 | -0.50                   | 1.73              | 0.88 | -0.23                   |
| <b>Tc</b> | 1.62              | 1.70 | -0.32                   | 1.71              | 0.82 | 0.13                    |
| <b>Ru</b> | 1.58              | 0.51 | -0.51                   | 1.66              | 0.00 | 0.26                    |
| <b>Rh</b> | 1.53              | 0.00 | -0.23                   | 1.60              | 0.00 | 0.03                    |
| <b>Pd</b> | 1.62              | 0.00 | 1.88                    | 1.51              | 0.00 | 0.24                    |
| <b>Ag</b> | 1.62              | 0.00 | 0.92                    | 2.07              | 0.00 | -0.29                   |
| <b>Cd</b> | 1.69              | 0.00 | 0.04                    | 1.80              | 0.00 | 2.10                    |
| <b>Hf</b> | 1.87              | 0.00 | -1.15                   | 2.36              | 0.00 | 0.22                    |
| <b>Ta</b> | 1.79              | 0.00 | -1.07                   | 1.79              | 0.00 | -0.78                   |
| <b>W</b>  | 1.72              | 0.91 | -1.17                   | 1.75              | 0.00 | -0.60                   |
| <b>Re</b> | 1.64              | 1.69 | -0.70                   | 1.72              | 0.91 | -0.34                   |
| <b>Os</b> | 1.60              | 1.00 | -0.63                   | 1.70              | 0.00 | -0.07                   |
| <b>Ir</b> | 1.56              | 0.00 | -0.35                   | 1.63              | 0.00 | -0.33                   |
| <b>Pt</b> | 1.60              | 0.00 | 1.54                    | 1.53              | 0.10 | 0.27                    |
| <b>Au</b> | 1.92              | 0.10 | 2.20                    | 1.58              | 0.00 | 1.57                    |

**Table S6** Bond distance ( $d_{\text{H-TM}}$  in Å) between adsorbed hydrogen and TM atom, magnetization values ( $M$  in  $\mu_B$ ) for H-adsorbed systems, and the hydrogen adsorption Gibbs free energies ( $\Delta G_{\text{H}^*}$  in eV) for the TM-MOF and TM-COF catalysts.

| System    | TM-MOF            |      |                         | TM-COF            |      |                         |
|-----------|-------------------|------|-------------------------|-------------------|------|-------------------------|
|           | $d_{\text{H-TM}}$ | $M$  | $\Delta G_{\text{H}^*}$ | $d_{\text{H-TM}}$ | $M$  | $\Delta G_{\text{H}^*}$ |
| <b>Sc</b> | 2.43              | 0.00 | 2.13                    | 2.37              | 0.00 | -0.38                   |
| <b>Ti</b> | 1.70              | 0.11 | -0.49                   | 1.74              | 3.09 | -0.49                   |
| <b>V</b>  | 1.65              | 1.33 | 0.08                    | 1.66              | 2.11 | -0.02                   |
| <b>Cr</b> | 1.59              | 2.32 | 0.28                    | 1.66              | 3.22 | -0.12                   |
| <b>Mn</b> | 1.52              | 2.38 | 0.21                    | 1.64              | 4.04 | -0.14                   |
| <b>Fe</b> | 1.49              | 0.96 | -0.06                   | 1.56              | 1.78 | -0.47                   |
| <b>Co</b> | 1.45              | 0.00 | -0.03                   | 1.51              | 1.26 | -0.10                   |
| <b>Ni</b> | 1.49              | 0.00 | 0.91                    | 1.48              | 0.16 | -0.09                   |
| <b>Cu</b> | 1.55              | 0.20 | 1.54                    | 1.50              | 0.00 | -0.02                   |
| <b>Zn</b> | 2.40              | 0.00 | 2.53                    | 1.53              | 0.01 | 0.71                    |
| <b>Y</b>  | 2.63              | 0.00 | 2.25                    | 2.54              | 0.20 | -0.74                   |
| <b>Zr</b> | 1.67              | 0.22 | -0.61                   | 1.84              | 0.34 | -0.85                   |
| <b>Nb</b> | 1.76              | 0.05 | -0.86                   | 1.75              | 0.00 | -0.89                   |
| <b>Mo</b> | 1.69              | 1.12 | -0.41                   | 1.68              | 1.46 | -0.49                   |
| <b>Tc</b> | 1.63              | 1.24 | -0.42                   | 1.62              | 0.04 | -0.80                   |
| <b>Ru</b> | 1.58              | 0.29 | -0.43                   | 1.57              | 0.12 | -0.54                   |
| <b>Rh</b> | 1.53              | 0.00 | 0.03                    | 1.61              | 0.00 | -0.20                   |
| <b>Pd</b> | 1.60              | 0.00 | 1.40                    | 1.56              | 0.04 | -0.25                   |
| <b>Ag</b> | 1.61              | 0.00 | 1.12                    | 1.62              | 0.00 | 0.11                    |
| <b>Cd</b> | 1.73              | 0.00 | 1.64                    | 3.47              | 0.00 | 1.32                    |
| <b>Hf</b> | 2.25              | 1.52 | -0.45                   | 2.31              | 0.59 | -1.05                   |
| <b>Ta</b> | 1.76              | 0.01 | -1.21                   | 1.74              | 0.00 | -1.11                   |
| <b>W</b>  | 1.71              | 0.86 | -1.30                   | 1.69              | 1.26 | -0.72                   |
| <b>Re</b> | 1.65              | 1.06 | -0.73                   | 1.65              | 1.27 | -1.05                   |
| <b>Os</b> | 1.60              | 0.34 | -0.23                   | 1.60              | 0.17 | -0.69                   |
| <b>Ir</b> | 1.56              | 0.00 | -0.11                   | 1.63              | 0.00 | -0.87                   |
| <b>Pt</b> | 1.57              | 0.00 | 1.10                    | 1.58              | 0.00 | -0.64                   |
| <b>Au</b> | 1.65              | 0.00 | 1.50                    | 1.57              | 0.00 | -0.21                   |

**Table S7** Bond distance ( $d_{\text{H-TM}}$  in Å) between adsorbed hydrogen to TM atom, magnetization values ( $M$  in  $\mu_{\text{B}}$ ) for H-adsorbed systems, and the hydrogen adsorption Gibbs free energies ( $\Delta G_{\text{H}^*}$  in eV) for the TM-Pc and TM-GDY catalysts.

| System | TM-Pc             |      |                         | TM-GDY            |      |                         |
|--------|-------------------|------|-------------------------|-------------------|------|-------------------------|
|        | $d_{\text{H-TM}}$ | $M$  | $\Delta G_{\text{H}^*}$ | $d_{\text{H-TM}}$ | $M$  | $\Delta G_{\text{H}^*}$ |
| Sc     | 2.71              | 0.00 | 2.10                    | 3.74              | 0.00 | 1.04                    |
| Ti     | 2.60              | 0.00 | 0.59                    | 3.60              | 0.00 | 1.10                    |
| V      | 1.64              | 1.50 | 0.44                    | 1.68              | 0.00 | -1.98                   |
| Cr     | 1.58              | 2.62 | 0.45                    | 1.61              | 0.00 | -0.75                   |
| Mn     | 1.51              | 2.32 | 0.53                    | 1.54              | 1.69 | 0.06                    |
| Fe     | 1.47              | 1.02 | 0.43                    | 1.48              | 1.06 | 0.10                    |
| Co     | 1.43              | 0.00 | 0.07                    | 1.43              | 0.00 | 0.06                    |
| Ni     | 1.65              | 0.33 | 1.94                    | 1.44              | 0.00 | 1.46                    |
| Cu     | 1.68              | 0.72 | 2.08                    | 1.56              | 0.17 | 1.93                    |
| Zn     | 1.70              | 0.11 | 2.13                    | 1.53              | 0.00 | -0.73                   |
| Y      | 2.82              | 0.01 | 0.98                    | 3.98              | 0.00 | -0.26                   |
| Zr     | 1.87              | 0.02 | -0.99                   | 1.92              | 1.00 | 0.22                    |
| Nb     | 1.77              | 0.75 | -0.69                   | 1.83              | 0.00 | -2.97                   |
| Mo     | 1.69              | 1.88 | -0.41                   | 1.74              | 0.00 | -2.12                   |
| Tc     | 1.61              | 1.58 | -0.47                   | 1.66              | 0.57 | -1.75                   |
| Ru     | 1.57              | 0.51 | -0.60                   | 1.59              | 0.58 | -1.11                   |
| Rh     | 1.51              | 0.00 | -0.68                   | 1.53              | 0.00 | -0.73                   |
| Pd     | 1.82              | 0.25 | 1.99                    | 1.52              | 0.00 | 1.19                    |
| Ag     | 1.82              | 0.59 | 2.10                    | 1.42              | 0.00 | 0.29                    |
| Cd     | 1.7               | 0.00 | 2.39                    | 1.41              | 0.00 | -1.70                   |
| Hf     | 1.84              | 0.00 | -1.60                   | 1.89              | 0.00 | -0.56                   |
| Ta     | 1.75              | 0.36 | -0.96                   | 1.82              | 0.00 | -2.33                   |
| W      | 1.70              | 1.49 | -0.76                   | 1.75              | 0.00 | -2.54                   |
| Re     | 1.63              | 1.49 | -0.82                   | 1.68              | 0.42 | -2.25                   |
| Os     | 1.59              | 0.59 | -0.83                   | 1.61              | 0.52 | -1.32                   |
| Ir     | 1.55              | 0.00 | -0.79                   | 1.56              | 0.00 | -0.77                   |
| Pt     | 1.62              | 0.18 | 1.77                    | 1.54              | 0.00 | 0.89                    |
| Au     | 1.97              | 0.10 | 2.21                    | 1.51              | 0.00 | -0.53                   |

**Table S8** Bond distance ( $d_{\text{H-TM}}$  in Å) between adsorbed hydrogen and TM atom, magnetization values ( $M$  in  $\mu_{\text{B}}$ ) for H-adsorbed systems, and the hydrogen adsorption Gibbs free energies ( $\Delta G_{\text{H}^*}$  in eV) for the TM-C<sub>2</sub>N and TM-C<sub>3</sub>N<sub>4</sub> catalysts.

| System    | TM-C <sub>2</sub> N |      |                         | TM-C <sub>3</sub> N <sub>4</sub> |      |                         |
|-----------|---------------------|------|-------------------------|----------------------------------|------|-------------------------|
|           | $d_{\text{H-TM}}$   | $M$  | $\Delta G_{\text{H}^*}$ | $d_{\text{H-TM}}$                | $M$  | $\Delta G_{\text{H}^*}$ |
| <b>Sc</b> | 2.38                | 0.33 | -0.45                   | 2.13                             | 0.00 | -0.25                   |
| <b>Ti</b> | 1.82                | 2.32 | 0.05                    | 1.7                              | 0.83 | -0.52                   |
| <b>V</b>  | 1.64                | 2.08 | 0.06                    | 1.63                             | 1.91 | -0.33                   |
| <b>Cr</b> | 1.6                 | 2.93 | 0.45                    | 1.59                             | 2.91 | -0.10                   |
| <b>Mn</b> | 1.64                | 4.21 | 0.32                    | 1.66                             | 4.36 | -0.22                   |
| <b>Fe</b> | 1.58                | 3.27 | 0.28                    | 1.61                             | 3.52 | -0.12                   |
| <b>Co</b> | 1.51                | 1.81 | 0.35                    | 1.53                             | 1.79 | 0.34                    |
| <b>Ni</b> | 1.51                | 1.07 | 0.50                    | 1.52                             | 1.08 | 0.02                    |
| <b>Cu</b> | 1.50                | 0.00 | 0.58                    | 1.50                             | 0.00 | -0.32                   |
| <b>Zn</b> | 1.53                | 0.00 | -0.22                   | 1.52                             | 0.00 | -1.00                   |
| <b>Y</b>  | 2.59                | 0.06 | 0.32                    | 1.95                             | 0.00 | -0.64                   |
| <b>Zr</b> | 1.81                | 0.21 | -0.58                   | 1.83                             | 0.00 | -0.97                   |
| <b>Nb</b> | 1.72                | 0.00 | -0.57                   | 1.74                             | 1.15 | -0.73                   |
| <b>Mo</b> | 1.67                | 1.71 | -0.37                   | 1.66                             | 0.26 | -0.53                   |
| <b>Tc</b> | 1.60                | 1.41 | -0.51                   | 1.61                             | 0.99 | -0.54                   |
| <b>Ru</b> | 1.56                | 0.00 | -0.65                   | 1.56                             | 0.10 | -0.80                   |
| <b>Rh</b> | 1.54                | 0.00 | 0.14                    | 1.52                             | 0.00 | -0.61                   |
| <b>Pd</b> | 1.53                | 0.00 | 0.83                    | 1.54                             | 0.00 | 0.05                    |
| <b>Ag</b> | 1.64                | 0.00 | 1.24                    | 1.62                             | 0.00 | -0.11                   |
| <b>Cd</b> | 1.72                | 0.00 | 0.21                    | 1.71                             | 0.00 | 1.05                    |
| <b>Hf</b> | 1.79                | 0.13 | -0.80                   | 1.8                              | 0.00 | -1.18                   |
| <b>Ta</b> | 1.72                | 0.00 | -0.86                   | 1.73                             | 0.80 | -0.99                   |
| <b>W</b>  | 1.68                | 1.15 | -0.76                   | 1.67                             | 0.00 | -0.82                   |
| <b>Re</b> | 1.63                | 1.51 | -0.92                   | 1.61                             | 0.00 | -1.32                   |
| <b>Os</b> | 1.59                | 0.00 | -0.79                   | 1.58                             | 0.02 | -0.97                   |
| <b>Ir</b> | 1.58                | 0.00 | -0.35                   | 1.61                             | 0.00 | -0.64                   |
| <b>Pt</b> | 1.56                | 0.00 | -0.47                   | 1.57                             | 0.00 | -1.44                   |
| <b>Au</b> | 1.57                | 0.00 | 0.01                    | 1.57                             | 0.00 | -1.90                   |



**Table S9** The comparison in the values of  $\Delta G_{\text{H}}^*$  on TM-N-C between our DFT-calculation results and previous DFT-calculation results.

| TM | $\Delta G_{\text{H}}^*$ (eV) |        |        |           |
|----|------------------------------|--------|--------|-----------|
|    | This work                    | Ref. 1 | Ref. 2 | Ref. 3    |
| Sc | 0.28                         | -0.34  | -0.28  | -0.19     |
| Ti | -0.75                        | -0.53  | -0.53  | -0.50     |
| V  | 0.09                         | -0.13  | -0.15  | -0.27     |
| Cr | 0.24                         | 0.32   | 0.28   | 0.31      |
| Mn | 0.35                         | 0.53   | 0.39   | 0.43      |
| Fe | 0.17                         | 0.44   | 0.28   | 0.25      |
| Co | 0.11                         | 0.32   | 0.16   | 0.15      |
| Ni | 1.60                         | 1.61   | 1.61   | 1.59      |
| Cu | 1.70                         | 1.31   | 1.72   | 1.68      |
| Zn | 0.98                         | 1.15   | 0.85   | 0.76      |
| Y  | -0.10                        | -0.22  | -0.12  | Not given |
| Zr | -0.9                         | -0.90  | -0.90  | -0.90     |
| Nb | -0.76                        | -0.74  | -0.89  | -0.76     |
| Mo | -0.50                        | -0.37  | -0.44  | -0.91     |
| Tc | -0.32                        | -0.36  | -0.46  | -0.46     |
| Ru | -0.51                        | -0.43  | -0.56  | -0.56     |
| Rh | -0.23                        | -0.07  | -0.26  | -0.17     |
| Pd | 1.88                         | 1.57   | 1.85   | 1.84      |
| Ag | 0.92                         | 0.36   | 0.82   | 0.73      |
| Cd | 0.04                         | -0.06  | 0.02   | -0.06     |
| Hf | -1.15                        | -1.09  | -1.13  | -1.04     |
| Ta | -1.07                        | -1.00  | -1.08  | -1.08     |
| W  | -1.17                        | -0.82  | -0.93  | -1.45     |
| Re | -0.7                         | -0.83  | -0.8   | -0.91     |
| Os | -0.63                        | -0.66  | -0.7   | -0.73     |
| Ir | -0.35                        | -0.21  | -0.37  | -0.30     |
| Pt | 1.54                         | 1.68   | 1.51   | 1.49      |
| Au | 2.20                         | 1.71   | 2.16   | 2.24      |

**Table S10** The selected input features obtained from the Mendeleev's periodic table and simple DFT calculation.

| Feature                              | Description                                                                                                                                                                                                                                                                                                                                                                                                                                                                                                                                                                                                                                                                                           |
|--------------------------------------|-------------------------------------------------------------------------------------------------------------------------------------------------------------------------------------------------------------------------------------------------------------------------------------------------------------------------------------------------------------------------------------------------------------------------------------------------------------------------------------------------------------------------------------------------------------------------------------------------------------------------------------------------------------------------------------------------------|
| M                                    | Atomic mass                                                                                                                                                                                                                                                                                                                                                                                                                                                                                                                                                                                                                                                                                           |
| R <sub>COV</sub>                     | Covalent radius                                                                                                                                                                                                                                                                                                                                                                                                                                                                                                                                                                                                                                                                                       |
| Z                                    | Atomic number                                                                                                                                                                                                                                                                                                                                                                                                                                                                                                                                                                                                                                                                                         |
| N <sub>p</sub>                       | Period number                                                                                                                                                                                                                                                                                                                                                                                                                                                                                                                                                                                                                                                                                         |
| N <sub>G</sub>                       | Group number                                                                                                                                                                                                                                                                                                                                                                                                                                                                                                                                                                                                                                                                                          |
| R                                    | Atomic radius of the TM atom                                                                                                                                                                                                                                                                                                                                                                                                                                                                                                                                                                                                                                                                          |
| $\chi$                               | Pauling electronegativity                                                                                                                                                                                                                                                                                                                                                                                                                                                                                                                                                                                                                                                                             |
| I <sub>1</sub>                       | First ionization potential                                                                                                                                                                                                                                                                                                                                                                                                                                                                                                                                                                                                                                                                            |
| I <sub>2</sub>                       | Second ionization potential                                                                                                                                                                                                                                                                                                                                                                                                                                                                                                                                                                                                                                                                           |
| V <sub>en</sub>                      | Valance electrons                                                                                                                                                                                                                                                                                                                                                                                                                                                                                                                                                                                                                                                                                     |
| e <sub>d</sub>                       | Electrons number of d orbital                                                                                                                                                                                                                                                                                                                                                                                                                                                                                                                                                                                                                                                                         |
| $\epsilon_d(\text{TM})$              | The d-band center of the corresponding pure metal surface of TM atom                                                                                                                                                                                                                                                                                                                                                                                                                                                                                                                                                                                                                                  |
| H <sub>xf</sub>                      | Enthalpy of hydride formation                                                                                                                                                                                                                                                                                                                                                                                                                                                                                                                                                                                                                                                                         |
| $\chi$                               | Average distance between TM atom and the coordination atoms<br>The product of Pauling electronegativity of TM atom and bond length between TM and coordination atoms                                                                                                                                                                                                                                                                                                                                                                                                                                                                                                                                  |
| N <sub>c</sub>                       | The number of coordination atoms. (N <sub>c</sub> = 4 for N-C, C, Pc, MOF, N <sub>c</sub> = 3 for COF, N <sub>c</sub> = 4/6 for C <sub>3</sub> N <sub>4</sub> , C <sub>2</sub> N, and N <sub>c</sub> = 6 for GDY supports. Though for C <sub>3</sub> N <sub>4</sub> and C <sub>2</sub> N supports, the results of RDF indicated that the coordination atoms may be 2.02 or 6, Weighing the computational cost (it is difficult to perform <i>ab initio</i> molecular dynamics for all systems) and considering the results of CDD, the charge transferring of TM to 4N/6N were observed, finally we adopted the N <sub>c</sub> = 4/6 for C <sub>2</sub> N and C <sub>3</sub> N <sub>4</sub> systems.) |
| Z <sub>c</sub>                       | Atomic number of coordination atoms                                                                                                                                                                                                                                                                                                                                                                                                                                                                                                                                                                                                                                                                   |
| I <sub>c</sub>                       | First ionization potential of coordination atoms                                                                                                                                                                                                                                                                                                                                                                                                                                                                                                                                                                                                                                                      |
| I <sub>1</sub> -I <sub>c</sub>       | The difference in first ionization potential between TM and coordination atoms                                                                                                                                                                                                                                                                                                                                                                                                                                                                                                                                                                                                                        |
| $\chi_c$                             | The Pauling electronegativity of coordination atoms                                                                                                                                                                                                                                                                                                                                                                                                                                                                                                                                                                                                                                                   |
| $\chi_{\text{TM}}-\chi_x$            | The difference in Pauling electronegativity of metal atoms and coordination atoms                                                                                                                                                                                                                                                                                                                                                                                                                                                                                                                                                                                                                     |
| $\epsilon_d$                         | The d-band center of the metal in system                                                                                                                                                                                                                                                                                                                                                                                                                                                                                                                                                                                                                                                              |
| $\theta_d$                           | Electrons number of unfilled d orbital                                                                                                                                                                                                                                                                                                                                                                                                                                                                                                                                                                                                                                                                |
| cm <sub>1</sub> to cm <sub>231</sub> | Coulomb matrix elements based on DFT optimized geometries                                                                                                                                                                                                                                                                                                                                                                                                                                                                                                                                                                                                                                             |

**Table S11** The reaction free energies (eV) of elementary step for OER on TM-C<sub>3</sub>N<sub>4</sub>, TM-C<sub>2</sub>N, TM-COF, TM-MOF, TM-Pc, TM-N-C and TM-C (TM = Cr, Mn, Fe, Co, Ni, Cu). The value highlighted in red indicates the PDS.

| System                        |    | $\Delta G_1$ | $\Delta G_2$ | $\Delta G_3$ | $\Delta G_4$ |
|-------------------------------|----|--------------|--------------|--------------|--------------|
| C <sub>3</sub> N <sub>4</sub> | Cr | -0.91        | 0.51         | 2.66         | 2.66         |
|                               | Mn | -0.89        | 1.4          | 1.95         | 2.46         |
|                               | Fe | -0.64        | 1.05         | 1.94         | 2.57         |
|                               | Co | -0.56        | 1.07         | 2.00         | 2.41         |
|                               | Ni | -0.41        | 1.49         | 1.65         | 2.19         |
|                               | Cu | -0.69        | 2.24         | 1.10         | 2.27         |
| C <sub>2</sub> N              | Cr | -0.34        | 0.58         | 2.40         | 2.28         |
|                               | Mn | -0.18        | 1.23         | 2.08         | 1.79         |
|                               | Fe | -0.15        | 1.19         | 2.04         | 1.84         |
|                               | Co | 0.00         | 1.12         | 1.85         | 1.95         |
|                               | Ni | 0.44         | 1.57         | 1.43         | 1.48         |
|                               | Cu | 0.75         | 1.94         | 1.10         | 1.13         |
| COF                           | Cr | -1.00        | 0.95         | 2.29         | 2.68         |
|                               | Mn | -0.78        | 0.90         | 2.45         | 2.35         |
|                               | Fe | -0.98        | 0.74         | 2.65         | 2.51         |
|                               | Co | -0.35        | 1.25         | 1.52         | 2.50         |
|                               | Ni | -0.21        | 1.52         | 1.65         | 1.96         |
|                               | Cu | -0.02        | 1.92         | 1.25         | 1.77         |
| MOF                           | Cr | 0.08         | 0.05         | 2.92         | 1.87         |
|                               | Mn | 0.33         | 0.67         | 2.47         | 1.45         |
|                               | Fe | 0.29         | 1.08         | 1.97         | 1.58         |
|                               | Co | 0.88         | 1.52         | 1.39         | 1.13         |
|                               | Ni | 1.46         | 1.94         | 1.05         | 0.47         |
|                               | Cu | 1.73         | 2.11         | 0.78         | 0.30         |
| Pc                            | Cr | 0.27         | 0.32         | 2.83         | 1.50         |
|                               | Mn | 0.75         | 0.72         | 2.56         | 0.89         |
|                               | Fe | 0.90         | 0.71         | 2.16         | 1.15         |
|                               | Co | 1.39         | 1.42         | 1.44         | 0.67         |
|                               | Ni | 2.29         | 2.17         | 0.52         | -0.06        |
|                               | Cu | 2.54         | 2.23         | 0.26         | -0.11        |
| N-C                           | Cr | -0.11        | -0.01        | 3.15         | 1.89         |
|                               | Mn | 0.48         | 0.45         | 2.69         | 1.30         |
|                               | Fe | 0.49         | 0.81         | 2.11         | 1.51         |
|                               | Co | 0.96         | 1.69         | 1.23         | 1.04         |
|                               | Ni | 2.03         | 2.17         | 0.62         | 0.10         |
|                               | Cu | 1.88         | 2.23         | 0.71         | 0.10         |
| C                             | Cr | -0.98        | 0.25         | 3.05         | 2.60         |
|                               | Mn | -0.49        | 0.20         | 3.04         | 2.17         |

|     |    |       |       |      |       |
|-----|----|-------|-------|------|-------|
|     | Fe | 0.10  | 0.14  | 2.75 | 1.93  |
|     | Co | 0.16  | 0.92  | 2.05 | 1.79  |
|     | Ni | 1.43  | 1.48  | 1.56 | 0.45  |
|     | Cu | 2.35  | 2.02  | 0.61 | -0.06 |
|     | Cr | -1.88 | -0.56 | 4.07 | 3.29  |
|     | Mn | -0.12 | -0.11 | 3.26 | 1.89  |
| GDY | Fe | 0.32  | 0.71  | 2.38 | 1.51  |
|     | Co | 1.11  | 1.08  | 1.87 | 0.86  |
|     | Ni | -0.69 | 1.90  | 0.92 | 2.79  |
|     | Cu | 1.97  | 1.81  | 1.06 | 0.08  |

**Table S12** Calculated overpotentials for OER ( $\eta^{\text{OER}}$ ) and the corresponding PDS on TM-C<sub>3</sub>N<sub>4</sub>, TM-C<sub>2</sub>N, TM-COF, TM-MOF, TM-Pc, TM-N-C and TM-C (TM = Cr, Mn, Fe, Co, Ni, Cu).

| System                        |    | PDS                                          | $\eta^{\text{OER}}$ (V) |
|-------------------------------|----|----------------------------------------------|-------------------------|
| C <sub>3</sub> N <sub>4</sub> | Cr | $\text{O}^* \rightarrow \text{OOH}^*$        | 1.43                    |
|                               | Mn | $\text{OOH}^* \rightarrow \text{O}_2$        | 1.23                    |
|                               | Fe | $\text{OOH}^* \rightarrow \text{O}_2$        | 1.34                    |
|                               | Co | $\text{OOH}^* \rightarrow \text{O}_2$        | 1.18                    |
|                               | Ni | $\text{OOH}^* \rightarrow \text{O}_2$        | 0.96                    |
|                               | Cu | $\text{OOH}^* \rightarrow \text{O}_2$        | 1.04                    |
| C <sub>2</sub> N              | Cr | $\text{O}^* \rightarrow \text{OOH}^*$        | 1.17                    |
|                               | Mn | $\text{O}^* \rightarrow \text{OOH}^*$        | 0.85                    |
|                               | Fe | $\text{O}^* \rightarrow \text{OOH}^*$        | 0.81                    |
|                               | Co | $\text{OOH}^* \rightarrow \text{O}_2$        | 0.72                    |
|                               | Ni | $\text{OH}^* \rightarrow \text{O}^*$         | 0.34                    |
|                               | Cu | $\text{OH}^* \rightarrow \text{O}^*$         | 0.71                    |
| COF                           | Cr | $\text{OOH}^* \rightarrow \text{O}_2$        | 1.45                    |
|                               | Mn | $\text{O}^* \rightarrow \text{OOH}^*$        | 1.22                    |
|                               | Fe | $\text{O}^* \rightarrow \text{OOH}^*$        | 1.42                    |
|                               | Co | $\text{OOH}^* \rightarrow \text{O}_2$        | 1.27                    |
|                               | Ni | $\text{OOH}^* \rightarrow \text{O}_2$        | 0.73                    |
|                               | Cu | $\text{OOH}^* \rightarrow \text{O}_2$        | 0.69                    |
| MOF                           | Cr | $\text{O}^* \rightarrow \text{OOH}^*$        | 1.69                    |
|                               | Mn | $\text{O}^* \rightarrow \text{OOH}^*$        | 1.24                    |
|                               | Fe | $\text{O}^* \rightarrow \text{OOH}^*$        | 0.74                    |
|                               | Co | $\text{OH}^* \rightarrow \text{O}^*$         | 0.29                    |
|                               | Ni | $\text{OH}^* \rightarrow \text{O}^*$         | 0.71                    |
|                               | Cu | $\text{OH}^* \rightarrow \text{O}^*$         | 0.88                    |
| Pc                            | Cr | $\text{O}^* \rightarrow \text{OOH}^*$        | 1.6                     |
|                               | Mn | $\text{O}^* \rightarrow \text{OOH}^*$        | 1.33                    |
|                               | Fe | $\text{O}^* \rightarrow \text{OOH}^*$        | 0.93                    |
|                               | Co | $\text{O}^* \rightarrow \text{OOH}^*$        | 0.21                    |
|                               | Ni | $\text{H}_2\text{O} \rightarrow \text{OH}^*$ | 1.06                    |
|                               | Cu | $\text{H}_2\text{O} \rightarrow \text{OH}^*$ | 1.31                    |
| N-C                           | Cr | $\text{O}^* \rightarrow \text{OOH}^*$        | 1.92                    |
|                               | Mn | $\text{O}^* \rightarrow \text{OOH}^*$        | 1.46                    |
|                               | Fe | $\text{O}^* \rightarrow \text{OOH}^*$        | 0.88                    |
|                               | Co | $\text{OH}^* \rightarrow \text{O}^*$         | 0.46                    |
|                               | Ni | $\text{OH}^* \rightarrow \text{O}^*$         | 0.94                    |
|                               | Cu | $\text{OH}^* \rightarrow \text{O}^*$         | 1.00                    |
| C                             | Cr | $\text{O}^* \rightarrow \text{OOH}^*$        | 1.82                    |
|                               | Mn | $\text{O}^* \rightarrow \text{OOH}^*$        | 1.81                    |

|     |    |                                              |      |
|-----|----|----------------------------------------------|------|
|     | Fe | $\text{O}^* \rightarrow \text{OOH}^*$        | 1.52 |
|     | Co | $\text{O}^* \rightarrow \text{OOH}^*$        | 0.82 |
|     | Ni | $\text{O}^* \rightarrow \text{OOH}^*$        | 0.33 |
|     | Cu | $\text{H}_2\text{O} \rightarrow \text{OH}^*$ | 1.12 |
| GDY | Cr | $\text{O}^* \rightarrow \text{OOH}^*$        | 2.84 |
|     | Mn | $\text{O}^* \rightarrow \text{OOH}^*$        | 2.03 |
|     | Fe | $\text{O}^* \rightarrow \text{OOH}^*$        | 1.15 |
|     | Co | $\text{O}^* \rightarrow \text{OOH}^*$        | 0.64 |
|     | Ni | $4\text{OOH}^* \rightarrow \text{O}_2$       | 1.56 |
|     | Cu | $\text{H}_2\text{O} \rightarrow \text{OH}^*$ | 0.74 |

**Table S13** Calculated adsorption free energies of intermediate ( $\Delta G_{O^*}$  and  $\Delta G_{OOH^*}$ ), and the reaction free energies ( $\Delta G_1$ ,  $\Delta G_2$ ,  $\Delta G_3$  and  $\Delta G_4$  in eV) of elementary step for OER ( $\eta^{OER}$ ) on the SAC with  $0.44 \text{ eV} \leq \Delta G_{OH^*} \leq 1.46 \text{ eV}$ .

| System           | $\Delta G_{OH^*}$ (Ref. 4) | $\Delta G_{O^*}$ | $\Delta G_{OOH^*}$ | $\Delta G_1$ | $\Delta G_2$ | $\Delta G_3$ | $\Delta G_4$ |      |
|------------------|----------------------------|------------------|--------------------|--------------|--------------|--------------|--------------|------|
| C <sub>2</sub> N | Ni                         | 0.44             | 2.01               | 3.44         | 0.44         | 1.57         | 1.43         | 1.48 |
|                  | Cu                         | 0.75             | 2.69               | 3.79         | 0.75         | 1.94         | 1.10         | 1.13 |
|                  | Rh                         | 0.60             | 1.81               | 3.39         | 0.60         | 1.21         | 1.58         | 1.53 |
|                  | Pd                         | 1.04             | 2.81               | 3.51         | 1.04         | 1.77         | 0.70         | 1.41 |
|                  | Cd                         | 0.55             | -1.59              | 3.83         | 0.55         | 2.56         | 0.72         | 1.09 |
|                  | Au                         | 0.91             | 2.85               | 3.99         | 0.91         | 1.95         | 1.14         | 0.93 |
| COF              | Ag                         | 0.45             | 2.78               | 3.68         | 0.45         | 2.33         | 0.90         | 1.24 |
| MOF              | Co                         | 0.88             | 2.40               | 3.79         | 0.88         | 1.52         | 1.39         | 1.13 |
|                  | Ni                         | 1.46             | 3.40               | 4.45         | 1.46         | 1.94         | 1.05         | 0.47 |
|                  | Zn                         | 0.83             | 3.30               | 4.06         | 0.83         | 2.47         | 0.50         | 1.12 |
|                  | Rh                         | 1.25             | 2.81               | 4.20         | 1.25         | 1.56         | 1.34         | 0.77 |
|                  | Cd                         | 1.44             | 2.30               | 4.39         | 1.44         | 0.86         | 2.09         | 0.53 |
|                  | Os                         | 0.49             | 0.27               | 3.52         | 0.49         | -0.23        | 3.25         | 1.40 |
|                  | Ir                         | 1.28             | 2.43               | 4.20         | 1.28         | 1.15         | 1.77         | 0.72 |
| Pc               | Mn                         | 0.75             | 1.47               | 4.03         | 0.75         | 0.72         | 2.56         | 0.89 |
|                  | Fe                         | 0.90             | 1.61               | 3.77         | 0.9          | 0.71         | 2.16         | 1.15 |
|                  | Co                         | 1.39             | 2.81               | 4.25         | 1.39         | 1.42         | 1.44         | 0.67 |
|                  | Rh                         | 0.91             | 2.62               | 3.84         | 0.91         | 1.71         | 1.22         | 1.08 |
|                  | Ir                         | 0.96             | 2.42               | 3.94         | 0.96         | 1.46         | 1.52         | 0.98 |
| GDY              | Co                         | 1.11             | 2.19               | 4.06         | 1.11         | 1.08         | 1.87         | 0.86 |
|                  | Rh                         | 0.79             | 1.91               | 3.57         | 0.79         | 1.11         | 1.67         | 1.35 |
|                  | Ir                         | 0.62             | 1.77               | 3.59         | 0.62         | 1.15         | 1.82         | 1.33 |
| N-C              | Mn                         | 0.48             | 0.93               | 3.62         | 0.48         | 0.45         | 2.69         | 1.3  |
|                  | Fe                         | 0.49             | 1.30               | 3.41         | 0.49         | 0.81         | 2.11         | 1.51 |
|                  | Co                         | 0.96             | 2.65               | 3.88         | 0.96         | 1.69         | 1.23         | 1.04 |
|                  | Rh                         | 0.96             | 2.57               | 3.89         | 0.96         | 1.62         | 1.32         | 1.03 |
|                  | Zn                         | 0.91             | 3.44               | 4.13         | 0.91         | 2.53         | 0.69         | 0.79 |
|                  | Ir                         | 1.01             | 2.31               | 3.97         | 1.01         | 1.30         | 1.66         | 0.95 |
| C                | Ni                         | 1.43             | 2.91               | 4.47         | 1.43         | 1.48         | 1.56         | 0.45 |
|                  | Pd                         | 1.22             | 2.89               | 4.27         | 1.22         | 1.67         | 1.38         | 0.65 |
|                  | Pt                         | 1.09             | 2.19               | 4.23         | 1.09         | 1.10         | 2.04         | 0.69 |



**Table S14** Calculated PDS and the corresponding overpotentials for OER ( $\eta^{\text{OER}}$ ) on the SAC with  $0.44 \text{ eV} \leq \Delta G_{\text{OH}^*} \leq 1.46 \text{ eV}$ .

| System           |    | PDS                                              | $\eta^{\text{OER}}$ |
|------------------|----|--------------------------------------------------|---------------------|
| C <sub>2</sub> N | Ni | $\mathcal{Q}\text{OH}^* \rightarrow \text{O}^*$  | 0.34                |
|                  | Cu | $\mathcal{Q}\text{OH}^* \rightarrow \text{O}^*$  | 0.71                |
|                  | Rh | $\mathcal{F}\text{O}^* \rightarrow \text{OOH}^*$ | 0.35                |
|                  | Pd | $\mathcal{Q}\text{OH}^* \rightarrow \text{O}^*$  | 0.54                |
|                  | Cd | $\mathcal{Q}\text{OH}^* \rightarrow \text{O}^*$  | 1.33                |
|                  | Au | $\mathcal{Q}\text{OH}^* \rightarrow \text{O}^*$  | 0.72                |
| COF              | Ag | $\mathcal{Q}\text{OH}^* \rightarrow \text{O}^*$  | 1.10                |
| MOF              | Co | $\mathcal{Q}\text{OH}^* \rightarrow \text{O}^*$  | 0.29                |
|                  | Ni | $\mathcal{Q}\text{OH}^* \rightarrow \text{O}^*$  | 0.71                |
|                  | Zn | $\mathcal{Q}\text{OH}^* \rightarrow \text{O}^*$  | 1.24                |
|                  | Rh | $\mathcal{Q}\text{OH}^* \rightarrow \text{O}^*$  | 0.33                |
|                  | Cd | $\mathcal{F}\text{O}^* \rightarrow \text{OOH}^*$ | 0.86                |
|                  | Os | $\mathcal{F}\text{O}^* \rightarrow \text{OOH}^*$ | 2.02                |
|                  | Ir | $\mathcal{F}\text{O}^* \rightarrow \text{OOH}^*$ | 0.54                |
| Pc               | Mn | $\mathcal{F}\text{O}^* \rightarrow \text{OOH}^*$ | 1.33                |
|                  | Fe | $\mathcal{F}\text{O}^* \rightarrow \text{OOH}^*$ | 0.93                |
|                  | Co | $\mathcal{F}\text{O}^* \rightarrow \text{OOH}^*$ | 0.21                |
|                  | Rh | $\mathcal{Q}\text{OH}^* \rightarrow \text{O}^*$  | 0.48                |
|                  | Ir | $\mathcal{F}\text{O}^* \rightarrow \text{OOH}^*$ | 0.29                |
| GDY              | Co | $\mathcal{F}\text{O}^* \rightarrow \text{OOH}^*$ | 0.64                |
|                  | Rh | $\mathcal{F}\text{O}^* \rightarrow \text{OOH}^*$ | 0.44                |
|                  | Ir | $\mathcal{F}\text{O}^* \rightarrow \text{OOH}^*$ | 0.59                |
| N-C              | Mn | $\mathcal{F}\text{O}^* \rightarrow \text{OOH}^*$ | 1.46                |
|                  | Fe | $\mathcal{F}\text{O}^* \rightarrow \text{OOH}^*$ | 0.88                |
|                  | Co | $\mathcal{Q}\text{OH}^* \rightarrow \text{O}^*$  | 0.46                |
|                  | Rh | $\mathcal{Q}\text{OH}^* \rightarrow \text{O}^*$  | 0.39                |
|                  | Zn | $\mathcal{Q}\text{OH}^* \rightarrow \text{O}^*$  | 1.30                |
|                  | Ir | $\mathcal{F}\text{O}^* \rightarrow \text{OOH}^*$ | 0.43                |
| C                | Ni | $\mathcal{F}\text{O}^* \rightarrow \text{OOH}^*$ | 0.33                |
|                  | Pd | $\mathcal{Q}\text{OH}^* \rightarrow \text{O}^*$  | 0.44                |
|                  | Pt | $\mathcal{F}\text{O}^* \rightarrow \text{OOH}^*$ | 0.81                |

**Table S15** The comparison in the values of  $\Delta G_{\text{OH}}^*$ ,  $\Delta G_{\text{O}}^*$  and  $\Delta G_{\text{OOH}}^*$  on Mn/Fe/Co/Rh/Zn/Ir-N-C and Ni/Pd/Pt-C between our DFT-calculation results and the previous DFT-calculation results.

| Systems | $\Delta G_{\text{OH}}^*$ (eV) |                   | $\Delta G_{\text{O}}^*$ (eV) |                   | $\Delta G_{\text{OOH}}^*$ (eV) |                   |      |
|---------|-------------------------------|-------------------|------------------------------|-------------------|--------------------------------|-------------------|------|
|         | This work                     | Ref. <sup>1</sup> | This work                    | Ref. <sup>1</sup> | This work                      | Ref. <sup>1</sup> |      |
| N-C     | Mn                            | 0.48              | 0.37                         | 0.93              | 0.82                           | 3.62              | 3.53 |
|         | Fe                            | 0.49              | 0.56                         | 1.3               | 1.17                           | 3.41              | 3.44 |
|         | Co                            | 0.96              | 0.98                         | 2.65              | 2.31                           | 3.88              | 4.08 |
|         | Rh                            | 0.96              | 0.96                         | 2.57              | 2.37                           | 3.89              | 3.90 |
|         | Zn                            | 0.91              | 0.56                         | 3.44              | 3.03                           | 4.13              | 3.78 |
|         | Ir                            | 1.01              | 1.04                         | 2.31              | 2.07                           | 3.97              | 3.97 |
| C       | Ni                            | 1.43              | 0.88                         | 2.91              | 2.23                           | 4.47              | 3.79 |
|         | Pd                            | 1.22              | 1.06                         | 2.89              | 2.4                            | 4.27              | 4.02 |
|         | Pt                            | 1.09              | 1.01                         | 2.19              | 1.99                           | 4.23              | 4.23 |

## Solvent effect

The effect of solvent on  $\eta^{\text{OER}}$ ,  $\eta^{\text{HER}}$ ,  $\Delta G_{\text{H}}^*$ ,  $\Delta G_{\text{O}}^*$ ,  $\Delta G_{\text{OH}}^*$  and  $\Delta G_{\text{OOH}}^*$  for the screened systems have been calculated by VASPsol,<sup>5</sup> a dielectric constant of 80 is set to simulate the water environment. The calculated results of  $\Delta G_{\text{H}}^*$  and  $\eta^{\text{HER}}$  with and without considering solvation correction have shown in Table S16. For the HER overpotentials, the solvent effect is found to be insignificant, and the  $\eta^{\text{HER}}$  for the screened SACs also can satisfy the activity criteria of  $|\eta^{\text{HER}}| \leq 0.15$  V after considering the solvent effect. In Table S17, we listed the  $\eta^{\text{OER}}$ ,  $\Delta G_{\text{O}}^*$ ,  $\Delta G_{\text{OH}}^*$  and  $\Delta G_{\text{OOH}}^*$  with and without considering solvation correction. Our results indicated that most of the  $\Delta G_{\text{O}}^*$ ,  $\Delta G_{\text{OH}}^*$  and  $\Delta G_{\text{OOH}}^*$  decrease by  $\sim 0.20$  eV after considering solvation correction, however, the values of  $\eta^{\text{OER}}$  is not changed significantly by solvation effects, the corrected values are at the range of  $-0.07 \sim 0.06$  V.

**Table S16** The calculated  $\Delta G_{\text{H}}^*$  for Co-N-C, Co-Pc, V/Fe/Co/Rh/Ir-MOF, and V/Tc/Rh/Os-C with (VASPsol) and without (VASP) considering solvation correction.

| System | $\Delta G_{\text{H}}^*$ (eV) |         | $\eta^{\text{HER}}$ (V) |         |
|--------|------------------------------|---------|-------------------------|---------|
|        | VASP                         | VASPsol | VASP                    | VASPsol |
| Co-N-C | 0.11                         | 0.15    | -0.11                   | -0.15   |
| Co-Pc  | 0.07                         | 0.10    | -0.07                   | -0.10   |
| V-MOF  | 0.08                         | -0.05   | -0.08                   | -0.05   |
| Fe-MOF | -0.06                        | 0.02    | -0.06                   | -0.15   |
| Co-MOF | -0.03                        | 0.08    | -0.03                   | -0.08   |
| Rh-MOF | 0.03                         | 0.10    | -0.03                   | -0.10   |
| Ir-MOF | -0.11                        | -0.01   | -0.11                   | -0.01   |
| V-C    | -0.09                        | 0.02    | -0.09                   | -0.02   |
| Tc-C   | 0.13                         | 0.12    | -0.13                   | -0.12   |
| Rh-C   | 0.03                         | 0.04    | -0.03                   | -0.04   |
| Os-C   | -0.07                        | 0.01    | -0.07                   | -0.01   |

**Table S17** The calculated  $\eta^{\text{OER}}$ ,  $\Delta G_{\text{O}}^*$ ,  $\Delta G_{\text{OH}}^*$  and  $\Delta G_{\text{OOH}}^*$  for Co/Rh/Ir-MOF, Co/Rh/Ir-Pc, Co/Rh-N-C and Ni/Pd-C with (VASPsol) and without (VASP) considering solvation correction.

| System        | $\Delta G_{\text{OH}^*}$ (eV) |         | $\Delta G_{\text{O}^*}$ (eV) |         | $\Delta G_{\text{OOH}^*}$ (eV) |         | $\eta^{\text{OER}}$ (V) |         |
|---------------|-------------------------------|---------|------------------------------|---------|--------------------------------|---------|-------------------------|---------|
|               | VASP                          | VASPsol | VASP                         | VASPsol | VASP                           | VASPsol | VASP                    | VASPsol |
| <b>Co-MOF</b> | 0.88                          | 0.70    | 2.40                         | 2.23    | 3.79                           | 3.62    | 0.29                    | 0.29    |
| <b>Rh-MOF</b> | 1.25                          | 1.07    | 2.81                         | 2.57    | 4.20                           | 3.99    | 0.33                    | 0.27    |
| <b>Ir-MOF</b> | 1.28                          | 1.14    | 2.43                         | 2.22    | 4.20                           | 4.04    | 0.54                    | 0.59    |
| <b>Co-Pc</b>  | 1.39                          | 1.27    | 2.81                         | 2.73    | 4.25                           | 4.13    | 0.21                    | 0.23    |
| <b>Rh-Pc</b>  | 0.91                          | 0.66    | 2.62                         | 2.44    | 3.84                           | 3.55    | 0.48                    | 0.55    |
| <b>Ir-Pc</b>  | 0.96                          | 0.71    | 2.42                         | 2.20    | 3.94                           | 3.66    | 0.29                    | 0.23    |
| <b>Co-N-C</b> | 0.96                          | 0.75    | 2.65                         | 2.38    | 3.88                           | 3.64    | 0.46                    | 0.40    |
| <b>Rh-N-C</b> | 0.96                          | 0.79    | 2.57                         | 2.34    | 3.89                           | 3.68    | 0.39                    | 0.33    |
| <b>Ni-C</b>   | 1.43                          | 1.27    | 2.91                         | 2.78    | 4.47                           | 4.32    | 0.33                    | 0.31    |
| <b>Pd-C</b>   | 1.22                          | 1.06    | 2.89                         | 2.72    | 4.27                           | 4.04    | 0.44                    | 0.43    |

## References

1. M. Ha, D. Y. Kim, M. Umer, V. Gladkikh, C. W. Myung and K. S. Kim, *Energ. & Environ. Sci.*, 2021, **14**, 3455-3468.
2. M. Umer, S. Umer, M. Zafari, M. Ha, R. Anand, A. Hajibabaei, A. Abbas, G. Lee and K. S. Kim, *J. Mater. Chem. A*, 2022, **10**, 6679-6689.
3. V. Fung, G. Hu, Z. Wu and D.-e. Jiang, *J. Phys. Chem. C*, 2020, **124**, 19571-19578.
4. Y. Wang, R. Hu, Y. Li, F. Wang, J. Shang and J. Shui, *Nano Res.*, 2022, **15**, 1054-1060.
5. K. Mathew, R. Sundararaman, K. Letchworth-Weaver, T. A. Arias and R. G. Hennig, *J Chem Phys*, 2014, **140**, 084106.
